# Supplementary material
Source: publisher site journal article supplement (https://www.dovepress.com/article/327329)
Supplement: Supplementary file 1 [file get_supplementary_file.php]

Figure legends:

**Figure 1.** The schematic of the timeline with specific treatment starts and ends. VC: mice treated with vitamin C (300 mg/kg); NMN: mice treated with nicotinamide mononucleotide (300 mg/kg).


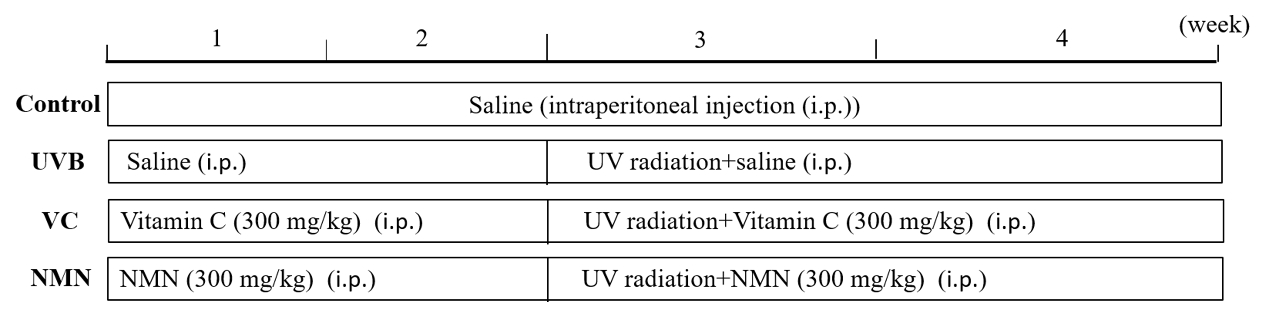


**Fig.1**
